# Supplementary material
Source: publisher figshare collection journal article supplement (https://acs.figshare.com/ndownloader/files/3961198)
Supplement: Supplementary file 1 [file 3961198]

**Development and Validation of a Reversed Phased-HPLC Method for Routine Identification and Purity Assessment of High-Purity Steviol Glycoside Sweeteners**

Tsion Bililign, † Jeffrey C Moore, †\* Shane Tan, † and Allan T Leeks, Jr.†

†Research and Development and Food Standards, United States Pharmacopeial Convention, 12601 Twinbrook Parkway, Rockville, Maryland 20852

## Supporting Information

**Table S-1.**

| <b>sample</b>                                                    | <b>individual<br/>assay<br/>% w/w</b> | <b>total<br/>assay<br/>% w/w</b> |
|------------------------------------------------------------------|---------------------------------------|----------------------------------|
| manufacturer A<br>CoA: rebaudioside A<br>53.24%,<br>total 96.58% | 53.00                                 | 97.94                            |
| manufacturer B<br>CoA: rebaudioside A<br>75.02%,<br>total 95.13% | 73.61                                 | 96.15                            |
| manufacturer C<br>CoA: stevioside 90%,<br>total 99.00%           | 92.00                                 | 100.78                           |

Table S-1. Commercial sample assay results in comparison to manufactures CoA for rebaudioside A or stevioside.
